# Supplementary material for: Statistical post-processing of precipitation forecasts using circulation classifications and spatiotemporal deep neural networks
Source: Copernicus journal article supplement (doi:10.5194/hess-2022-432), 2023-01-02
Supplement: Supplementary file 1 [file hess-2022-432-supplement.pdf]

Supplement of

**Statistical post-processing of precipitation forecasts using circulation classifications and spatiotemporal deep neural networks**

Tuantuan Zhang et al.

*Correspondence to:* Zhongmin Liang([zmliang@hhu.edu.cn](mailto:zmliang@hhu.edu.cn))

The copyright of individual parts of the supplement might differ from the article licence.

## Supplement

Contents of this file

Tables S1 to S3 show the statistical relationship between each circulation pattern and precipitation in spring, autumn and winter, respectively, including the percent of each circulation pattern, the percent of rainy days, and the percent of precipitation contribution. Figures S1 to S3 respectively show the circulation pattern at the lead time of 1 day in spring, autumn and winter during 2007-2021.

**Table S1** Contribution of different circulation patterns(CPs) to spring precipitation at the lead time of 1 day during 2007-2021

| Category                                 | CP1   | CP2   | CP3   | CP4   | CP5   | CP6   |
|------------------------------------------|-------|-------|-------|-------|-------|-------|
| CPs days                                 | 274   | 204   | 191   | 232   | 211   | 268   |
| Precipitation days                       | 54    | 21    | 44    | 96    | 89    | 93    |
| Total precipitation(mm)                  | 254   | 66    | 212   | 746   | 719   | 610   |
| Percent of CPs days(%)                   | 19.86 | 14.78 | 13.84 | 16.81 | 15.29 | 19.42 |
| Percent of rainy days(%)                 | 19.71 | 10.29 | 23.04 | 41.38 | 42.18 | 34.70 |
| Percent of precipitation contribution(%) | 9.74  | 2.53  | 8.13  | 28.62 | 27.58 | 23.40 |

**Table S2** Contribution of different circulation patterns(CPs) to autumn precipitation at the lead time of 1 day during 2007-2021

| Category                                 | CP1   | CP2   | CP3   | CP4   | CP5   | CP6   |
|------------------------------------------|-------|-------|-------|-------|-------|-------|
| CPs days                                 | 361   | 173   | 116   | 306   | 209   | 200   |
| Precipitation days                       | 123   | 36    | 15    | 127   | 53    | 62    |
| Total precipitation(mm)                  | 772   | 165   | 50    | 982   | 401   | 378   |
| Percent of CPs days(%)                   | 26.45 | 12.67 | 8.50  | 22.42 | 15.31 | 14.65 |
| Percent of rainy days(%)                 | 34.07 | 20.81 | 12.93 | 41.50 | 25.36 | 31.00 |
| Percent of precipitation contribution(%) | 28.09 | 6.00  | 1.82  | 35.74 | 14.59 | 13.76 |

**Table S3** Contribution of different circulation patterns(CPs) to winter precipitation at the lead time of 1 day during 2007-2021

| Category                                 | CP1   | CP2   | CP3   | CP4   | CP5   | CP6   |
|------------------------------------------|-------|-------|-------|-------|-------|-------|
| CPs days                                 | 205   | 242   | 243   | 246   | 260   | 158   |
| Precipitation days                       | 28    | 24    | 30    | 48    | 53    | 35    |
| Total precipitation(mm)                  | 122   | 125   | 141   | 226   | 242   | 227   |
| Percent of CPs days(%)                   | 15.14 | 17.87 | 17.95 | 18.17 | 19.20 | 11.67 |
| Percent of rainy days(%)                 | 13.66 | 9.92  | 12.35 | 19.51 | 20.38 | 22.15 |
| Percent of precipitation contribution(%) | 11.27 | 11.54 | 13.02 | 20.87 | 22.34 | 20.96 |

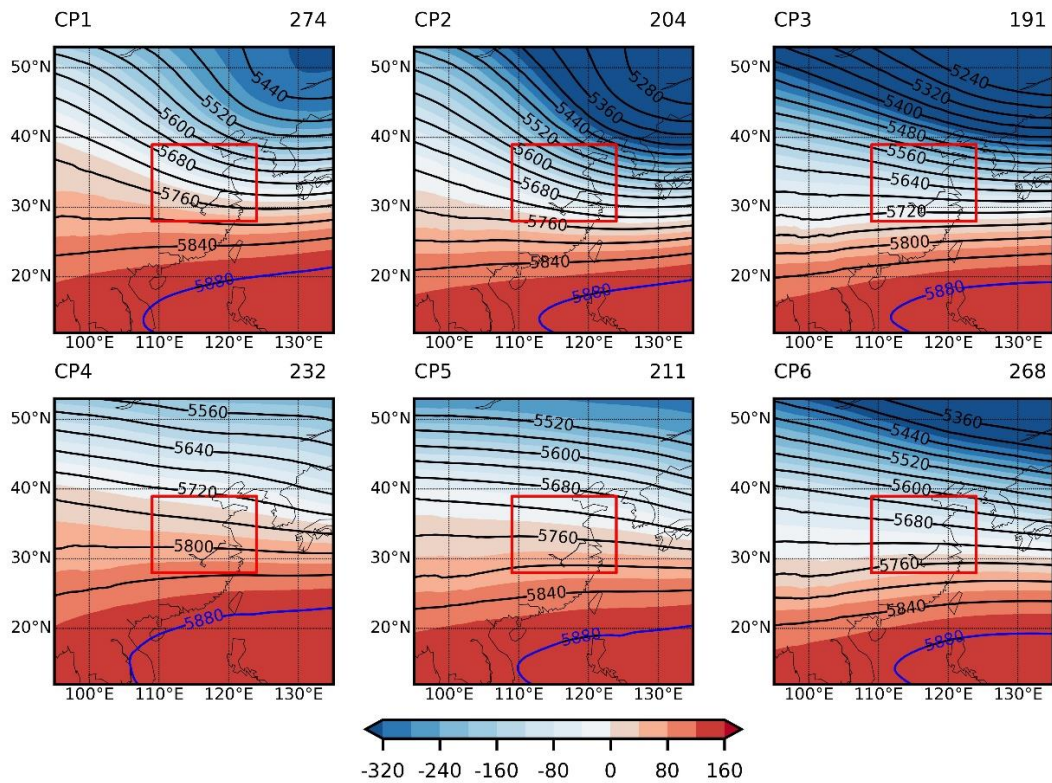

**Figure S1** Circulation patterns at the lead time of 1 day in the spring of 2007-2021. The bold blue line (5880 gpm) is the characteristic position of WPSH; The red rectangle represents the scope of the Huaihe River basin; The colored shading stands for the geopotential height anomalies at 500 hPa; The numbers for each circulation pattern are shown in the upper right corner.

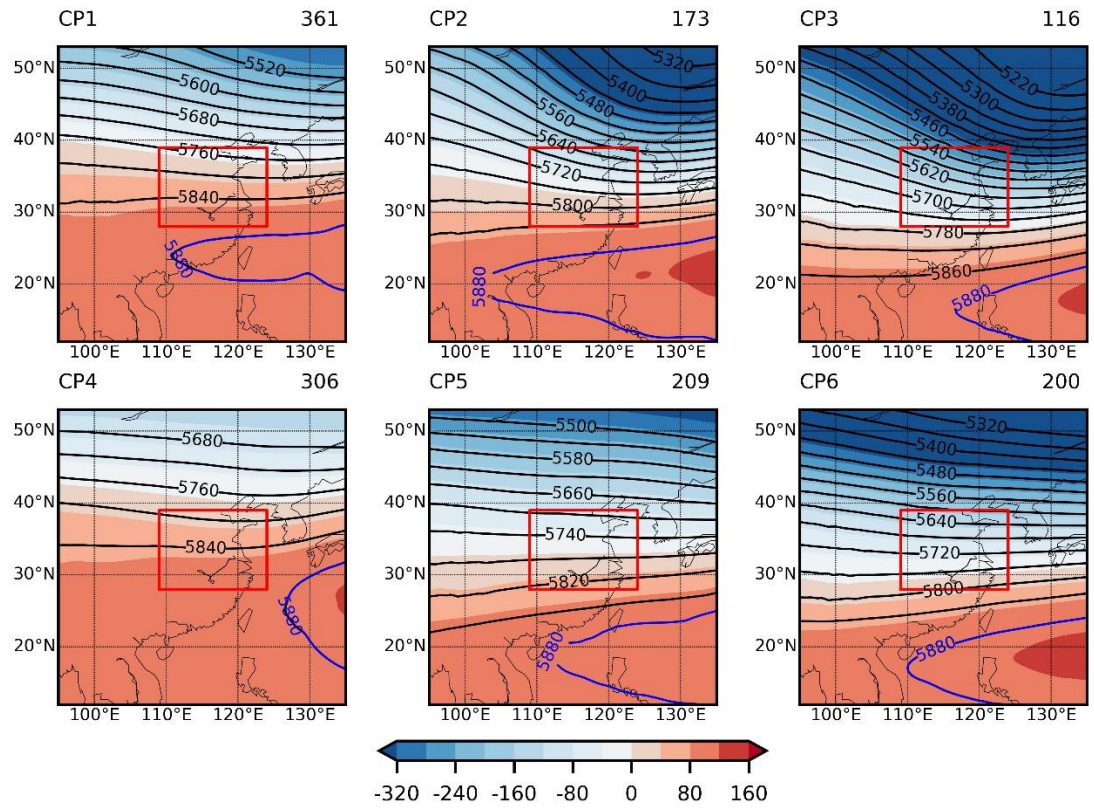

**Figure S2** Circulation patterns at the lead time of 1 day in the autumn of 2007-2021. The bold blue line (5880 gpm) is the characteristic position of WPSH; The red rectangle represents the scope of the Huaihe River basin; The colored shading stands for the geopotential height anomalies at 500 hPa; The numbers for each circulation pattern are shown in the upper right corner.

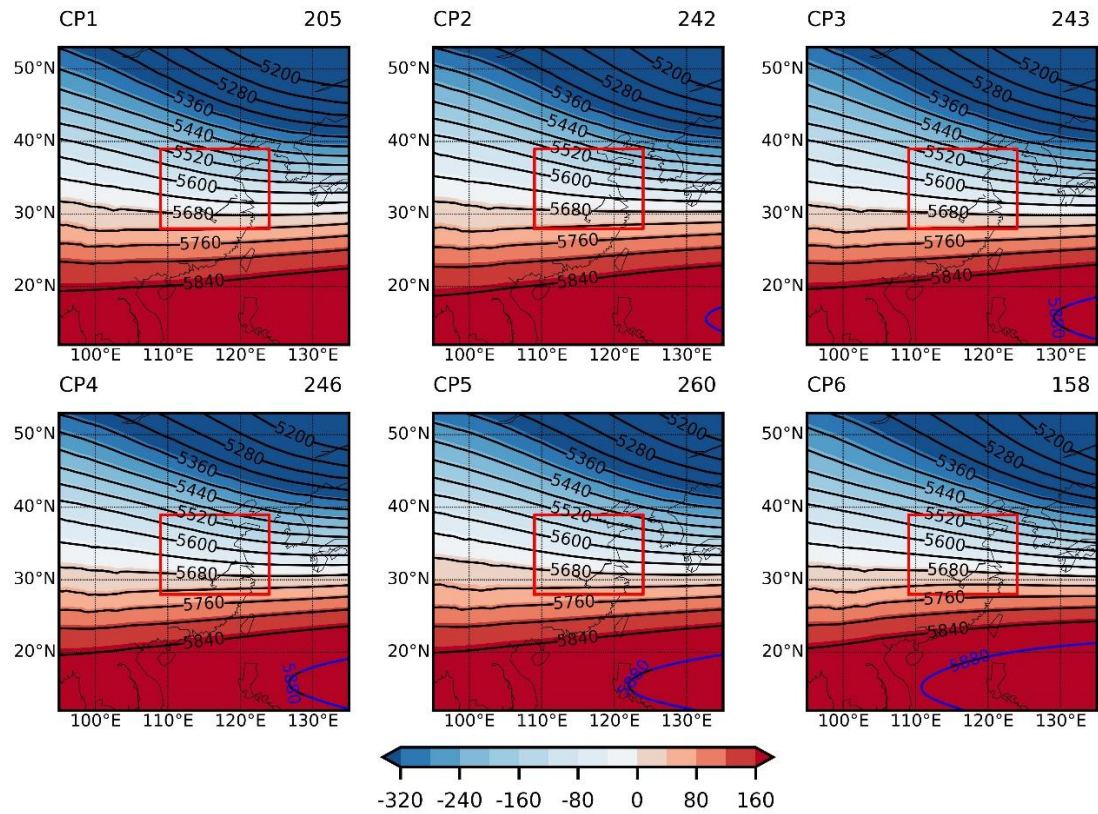

**Figure S3** Circulation patterns at the lead time of 1 day in the winter of 2007-2021. The bold blue line (5880 gpm) is the characteristic position of WPSH; The red rectangle represents the scope of the Huaihe River basin; The colored shading stands for the geopotential height anomalies at 500 hPa; The numbers for each circulation pattern are shown in the upper right corner.
